# Supplementary material
Source: PubMed Central journal article supplement (PMC6713564)
Supplement: EMS84116-supplement-Appendix_A.pdf [file EMS84116-supplement-Appendix_A.pdf]

## Appendix A

With two predictors ( $y_1$  and  $y_2$ ), and just looking at one indicator ( $x_1$ ) of a single latent variable, the covariance between  $x_1$  and  $y_1$  ( $cov_{x_1,y_1}$ ) is

$$cov_{x_1,y_1} = \lambda_{x_1}\beta_{y_1}\sigma_{y_1} + \lambda_{x_1}\beta_{y_2}\sigma_{y_1,y_2},$$

where  $\lambda_{x_1}$  is the factor loading for  $x_1$ ,  $\beta_{y_1}$  is the regression coefficient for  $y_1$ ,  $\sigma_{y_1}$  is the variance of  $y_1$ , and  $\sigma_{y_1,y_2}$  is the covariance between  $y_1$  and  $y_2$ .

This means that when predictor covariance is high, the estimation of the second regression coefficient plays a large role. Thus, whenever we over-penalize parameters, either because we don't have a large enough sample size to estimate them, or we just want sparsity, this bias is not just incurred in the regression, but will trickle down to the factor loadings. This is always a problem, as  $\lambda_{x_1}$  will try and "make up for" the downward bias of  $\beta_{y_1}$ , but it can be exacerbated to a large extent when there is covariance among predictors. Add in a large numbers of predictors and this makes the problem much worse.
